# Supplementary material for: Theoretical design of porphyrazine derivatives as promising sensitizers for dye-sensitized solar cells
Source: Royal Society of Chemistry journal article supplement (doi:10.1039/c4ra02204a), 2014-01-01
Supplement: c4ra02204a1.pdf [file c4ra02204a1.pdf]

Supporting Information to:

## Theoretical Design of Porphyrazine Derivatives as Promising Sensitizers for Dye-Sensitized Solar Cells

Jin-Hua Luo,<sup>a</sup> Quan-Song Li\*,<sup>a</sup> Li-Na Yang,<sup>a</sup> Zhu-Zhu Sun,<sup>a</sup> Ze-Sheng Li<sup>a,\*</sup>

<sup>a</sup> Key Laboratory of Cluster Science of Ministry of Education, Beijing Key Laboratory of Photoelectronic/ Electrophotonic Conversion Materials, Beijing Key Laboratory for Chemical Power Source and Green Catalysis, School of Chemistry, Beijing Institute of Technology, Beijing 100081, China

### Contents:

1. Cartesian coordinates of optimized structures
2. Frontier molecular orbitals of zinc porphyrazine derivatives calculated at the B3LYP/6-31G(d) level in chloroform solution.
3. The computational details of  $E_{OX}^{dye}$

---

\* Corresponding author at: 5 South Zhongguancun Street Haidian Zone, Beijing 10081, China. Tel.: +86 10 68918670; fax: +86 10 68918670  
Email address: [liquansong@bit.edu.cn](mailto:liquansong@bit.edu.cn) (Q. -S. Li); [zeshengli@bit.edu.cn](mailto:zeshengli@bit.edu.cn) (Z.-S. Li)

## 1. Cartesian coordinates of optimized structures

The abbreviations used here are consistent with those in the text.

### ZnPz

|    |             |             |             |
|----|-------------|-------------|-------------|
| N  | -0.82433100 | 1.72595700  | 0.07704700  |
| C  | -0.16545800 | 2.91759500  | -0.04057000 |
| N  | 1.15782000  | 3.10283100  | -0.13822000 |
| N  | 1.82646500  | 0.77582800  | -0.08751100 |
| C  | 2.06378300  | 2.11643600  | -0.16912900 |
| C  | 3.50976800  | 2.33710400  | -0.35503600 |
| N  | -1.77315600 | -0.92828600 | 0.12296900  |
| N  | 0.87641200  | -1.88141400 | -0.02915700 |
| C  | -2.96691000 | -0.26450500 | 0.11654800  |
| C  | 0.20868600  | -3.07240100 | -0.06923000 |
| C  | 3.01168200  | 0.11072300  | -0.23205700 |
| C  | -4.04584300 | -1.24709300 | 0.07236800  |
| C  | 1.18359700  | -4.14528400 | -0.23023400 |
| C  | 4.07705600  | 1.09368600  | -0.39267100 |
| N  | -3.15344900 | 1.06317200  | 0.10969900  |
| N  | -1.11907100 | -3.25642300 | -0.01516100 |
| N  | 3.19396800  | -1.21705800 | -0.26429200 |
| C  | -2.16669600 | 1.96724600  | 0.07577900  |
| C  | -2.01894500 | -2.26940800 | 0.05870400  |
| C  | 2.21135800  | -2.12253900 | -0.18192000 |
| C  | -3.47809700 | -2.48974700 | 0.03592900  |
| C  | 2.42502300  | -3.57681100 | -0.30076000 |
| Zn | 0.04043000  | -0.07665200 | 0.26085500  |
| C  | -1.15303700 | 3.99154600  | -0.08980500 |
| C  | -2.39359000 | 3.42235200  | -0.01954000 |
| C  | -3.74977800 | 4.06234600  | -0.04761700 |
| C  | -3.73055900 | 5.58823700  | -0.17520800 |
| H  | -4.29517100 | 3.77071500  | 0.86092700  |
| H  | -4.32665800 | 3.62516800  | -0.87431800 |
| H  | -4.75146100 | 5.98377200  | -0.18722100 |
| H  | -3.19998700 | 6.05197300  | 0.66426200  |
| H  | -3.23628400 | 5.90431600  | -1.10095300 |
| C  | -4.12370200 | -3.84170200 | -0.03399500 |
| C  | -5.65396500 | -3.81413800 | -0.08426300 |
| H  | -3.78947100 | -4.43596300 | 0.82807800  |

|   |             |             |             |
|---|-------------|-------------|-------------|
| H | -3.72982800 | -4.37304800 | -0.91133900 |
| H | -6.05328000 | -4.83251400 | -0.13218300 |
| H | -6.07366300 | -3.32985200 | 0.80488100  |
| H | -6.01377400 | -3.26971900 | -0.96481600 |
| C | 3.76168800  | -4.23748900 | -0.45766800 |
| C | 4.56994400  | -4.27780700 | 0.85421600  |
| H | 4.34344400  | -3.69630200 | -1.21391800 |
| H | 3.61766100  | -5.25791500 | -0.83110700 |
| H | 5.53659100  | -4.76786900 | 0.69266800  |
| H | 4.75724400  | -3.26508400 | 1.22514400  |
| H | 4.03098200  | -4.83249700 | 1.63033500  |
| C | 4.16529500  | 3.68104500  | -0.46398700 |
| C | 4.28245100  | 4.40402200  | 0.89233300  |
| H | 3.58431800  | 4.30975000  | -1.14984200 |
| H | 5.16257100  | 3.56120000  | -0.90276700 |
| H | 4.76514500  | 5.37950900  | 0.76529900  |
| H | 3.29299600  | 4.56625600  | 1.33158800  |
| H | 4.87892800  | 3.81709500  | 1.59962200  |
| H | -0.90389700 | 5.03997400  | -0.18386000 |
| H | -5.09701900 | -0.99240400 | 0.05538400  |
| H | 0.93109000  | -5.19583700 | -0.29855700 |
| H | 5.12153600  | 0.84611600  | -0.53369700 |

## L1

|   |             |             |             |
|---|-------------|-------------|-------------|
| N | 1.97023300  | -0.08723200 | 0.00009400  |
| C | 2.53996600  | -1.32883600 | 0.00010800  |
| N | 1.91899800  | -2.50846900 | 0.00008700  |
| N | -0.36040700 | -1.70224400 | 0.00001000  |
| C | 0.58415000  | -2.67177500 | 0.00003700  |
| C | -0.07558400 | -3.99616900 | 0.00002300  |
| N | 0.33041000  | 2.23153800  | 0.00007300  |
| N | -1.99062200 | 0.61138700  | 0.00002900  |
| C | 1.54752000  | 2.81983100  | 0.00011400  |
| C | -2.58251600 | 1.85112800  | 0.00003000  |
| C | -1.60301200 | -2.29477000 | -0.00005100 |
| C | 1.38204000  | 4.28881900  | 0.00013100  |
| C | -4.00707700 | 1.68502800  | -0.00002900 |
| C | -1.41667700 | -3.74569400 | -0.00005900 |
| N | 2.74811200  | 2.20824000  | 0.00013000  |
| N | -1.95302300 | 3.04809700  | 0.00007200  |
| N | -2.77999100 | -1.68056600 | -0.00010400 |
| C | 2.93015100  | 0.89016300  | 0.00012500  |
| C | -0.63764800 | 3.21481300  | 0.00008900  |

|    |             |             |             |
|----|-------------|-------------|-------------|
| C  | -2.95072200 | -0.34160600 | -0.00007200 |
| C  | 0.03596000  | 4.51275400  | 0.00011200  |
| C  | -4.26366000 | 0.31492200  | -0.00017100 |
| Zn | -0.01535800 | 0.26558100  | 0.00007100  |
| C  | 4.00331400  | -1.16555300 | 0.00018200  |
| C  | 5.03035200  | -2.09944400 | 0.00023100  |
| C  | 4.24752600  | 0.23755100  | 0.00018900  |
| C  | 6.33971600  | -1.58898700 | 0.00030000  |
| C  | 5.53366800  | 0.76635700  | 0.00024400  |
| H  | 5.73086700  | 1.83250000  | 0.00025100  |
| H  | 4.82767700  | -3.16550200 | 0.00022800  |
| H  | -2.22944000 | -4.45941200 | -0.00009700 |
| H  | -4.71930400 | 2.49686600  | -0.00003400 |
| H  | -0.48339600 | 5.46150100  | 0.00011200  |
| C  | 0.66321500  | -5.30070400 | 0.00009200  |
| C  | -0.23672100 | -6.53950900 | 0.00004700  |
| H  | 1.33294600  | -5.32411500 | 0.87109800  |
| H  | 1.33307400  | -5.32413900 | -0.87081300 |
| H  | 0.36906700  | -7.45141900 | 0.00011100  |
| H  | -0.88130400 | -6.56356300 | 0.88603300  |
| H  | -0.88116900 | -6.56359700 | -0.88603700 |
| C  | 2.52272700  | 5.26211100  | 0.00017800  |
| C  | 2.09997600  | 6.73375700  | -0.00023200 |
| H  | 3.16029100  | 5.05502500  | -0.87063600 |
| H  | 3.15989100  | 5.05541200  | 0.87138000  |
| H  | 2.98051800  | 7.38434000  | -0.00018800 |
| H  | 1.50242100  | 6.97630800  | -0.88632800 |
| H  | 1.50204900  | 6.97670300  | 0.88550400  |
| C  | 6.54806000  | -0.18578500 | 0.00030200  |
| C  | 7.65916400  | -2.16964700 | 0.00036800  |
| C  | 8.52901100  | -1.12864800 | 0.00040600  |
| O  | 7.88704100  | 0.08659800  | 0.00036900  |
| H  | 7.91524000  | -3.21960900 | 0.00038700  |
| H  | 9.60746400  | -1.07503600 | 0.00045900  |
| C  | -5.47693500 | -0.44372700 | -0.00041700 |
| C  | -6.77548500 | -0.01139900 | -0.00038800 |
| H  | -5.33056000 | -1.51978800 | -0.00075400 |
| C  | -7.13544400 | 1.37051800  | -0.00002700 |
| N  | -7.41084800 | 2.50200400  | 0.00026400  |
| C  | -7.92492400 | -0.94879300 | -0.00081200 |
| O  | -9.09010700 | -0.59537200 | -0.00115800 |
| O  | -7.55108900 | -2.24701400 | -0.00078600 |
| H  | -8.37305600 | -2.77312200 | -0.00110400 |

**L2**

|    |             |             |             |
|----|-------------|-------------|-------------|
| N  | 1.75487400  | -0.07457000 | 0.00228700  |
| C  | 2.32834400  | -1.31483800 | 0.00150200  |
| N  | 1.71165400  | -2.49677200 | 0.00166700  |
| N  | -0.57055400 | -1.69865000 | 0.00243500  |
| C  | 0.37754400  | -2.66488600 | 0.00215800  |
| C  | -0.27735000 | -3.99178600 | 0.00214100  |
| N  | 0.10486700  | 2.23790700  | 0.00219000  |
| N  | -2.20997500 | 0.60862400  | 0.00255600  |
| C  | 1.31942000  | 2.83143800  | 0.00175500  |
| C  | -2.80684800 | 1.84597600  | 0.00160200  |
| C  | -1.81098200 | -2.29590600 | 0.00246800  |
| C  | 1.14781800  | 4.29981100  | 0.00134100  |
| C  | -4.23064000 | 1.67436200  | 0.00050900  |
| C  | -1.61927100 | -3.74618500 | 0.00234900  |
| N  | 2.52245800  | 2.22492000  | 0.00138600  |
| N  | -2.18195800 | 3.04541100  | 0.00147400  |
| N  | -2.99031600 | -1.68639200 | 0.00230000  |
| C  | 2.71008100  | 0.90755200  | 0.00139000  |
| C  | -0.86735800 | 3.21728100  | 0.00177300  |
| C  | -3.16639300 | -0.34806800 | 0.00208000  |
| C  | -0.19914200 | 4.51804400  | 0.00134000  |
| C  | -4.48188800 | 0.30322500  | 0.00086300  |
| Zn | -0.23332600 | 0.27057800  | 0.00284900  |
| C  | 3.79023400  | -1.14404100 | 0.00017200  |
| C  | 4.82679800  | -2.06110900 | -0.00121700 |
| C  | 4.02929500  | 0.25856900  | 0.00011000  |
| C  | 6.14393600  | -1.55808800 | -0.00274500 |
| C  | 5.31373000  | 0.78114300  | -0.00135200 |
| H  | 5.48954300  | 1.85197600  | -0.00144800 |
| H  | 4.63559000  | -3.12987900 | -0.00121300 |
| H  | -2.42943600 | -4.46283400 | 0.00232300  |
| H  | -4.94601300 | 2.48340400  | -0.00036000 |
| H  | -0.72258800 | 5.46453500  | 0.00098900  |
| C  | 0.46632500  | -5.29348800 | 0.00180800  |
| C  | -0.42895500 | -6.53560700 | 0.00162700  |
| H  | 1.13628000  | -5.31453200 | 0.87269500  |
| H  | 1.13611100  | -5.31415500 | -0.86921700 |
| H  | 0.18025500  | -7.44523000 | 0.00133600  |
| H  | -1.07325100 | -6.56232700 | 0.88773100  |

|   |             |             |             |
|---|-------------|-------------|-------------|
| H | -1.07346900 | -6.56190600 | -0.88433200 |
| C | 2.28438500  | 5.27790400  | 0.00092100  |
| C | 1.85533100  | 6.74775900  | 0.00018600  |
| H | 2.92264700  | 5.07333000  | -0.86997700 |
| H | 2.92255400  | 5.07419900  | 0.87209600  |
| H | 2.73309200  | 7.40207700  | -0.00011500 |
| H | 1.25657700  | 6.98745600  | -0.88587000 |
| H | 1.25653900  | 6.98833800  | 0.88597800  |
| C | 6.36270400  | -0.14669300 | -0.00278500 |
| C | 7.38322900  | -2.29028700 | -0.00451800 |
| C | 8.47709600  | -1.48360500 | -0.00585000 |
| H | 7.43680900  | -3.37335100 | -0.00479100 |
| H | 9.51813800  | -1.77949900 | -0.00730800 |
| S | 8.07808200  | 0.22029500  | -0.00501800 |
| C | -5.69221300 | -0.46011100 | 0.00005000  |
| C | -6.99238000 | -0.03272300 | -0.00265500 |
| H | -5.54172900 | -1.53561200 | 0.00164300  |
| C | -7.35753900 | 1.34773300  | -0.00569100 |
| N | -7.63739400 | 2.47811300  | -0.00833900 |
| C | -8.13827600 | -0.97437800 | -0.00312900 |
| O | -9.30474100 | -0.62527500 | -0.00665400 |
| O | -7.75967500 | -2.27119900 | 0.00042800  |
| H | -8.57964700 | -2.80040700 | -0.00044700 |

### L3

|   |             |             |             |
|---|-------------|-------------|-------------|
| N | -0.30769400 | 0.29468300  | 0.00193500  |
| C | 0.41734800  | -0.86208100 | 0.00194300  |
| N | -0.03918600 | -2.11391500 | 0.00210700  |
| N | -2.40463600 | -1.61506300 | 0.00191200  |
| C | -1.34036000 | -2.45344800 | 0.00209100  |
| C | -1.81999900 | -3.85210500 | 0.00213500  |
| N | -2.24038700 | 2.37524600  | 0.00149500  |
| N | -4.32554300 | 0.46399900  | 0.00172200  |
| C | -1.11041600 | 3.11940000  | 0.00143000  |
| C | -5.07559900 | 1.61344400  | 0.00092500  |
| C | -3.55724700 | -2.36583500 | 0.00181600  |
| C | -1.46952000 | 4.55452100  | 0.00124700  |
| C | -6.46710900 | 1.26033300  | -0.00009400 |
| C | -3.18279900 | -3.77910100 | 0.00197500  |
| N | 0.15855500  | 2.67367600  | 0.00139300  |
| N | -4.61124600 | 2.88334900  | 0.00091000  |
| N | -4.80617600 | -1.91130500 | 0.00146400  |
| C | 0.51639600  | 1.38984400  | 0.00152300  |

|    |             |             |             |
|----|-------------|-------------|-------------|
| C  | -3.32870600 | 3.22174600  | 0.00122300  |
| C  | -5.15178500 | -0.60847200 | 0.00123400  |
| C  | -2.83287900 | 4.59821900  | 0.00110900  |
| C  | -6.54071200 | -0.13045600 | 0.00004900  |
| Zn | -2.32256900 | 0.38127300  | 0.00190100  |
| C  | 1.84776700  | -0.50615500 | 0.00165900  |
| C  | 2.98374900  | -1.30651600 | 0.00159300  |
| C  | 1.90288100  | 0.91688500  | 0.00128300  |
| C  | 4.20470000  | -0.62160600 | 0.00102500  |
| C  | 3.11962600  | 1.59026400  | 0.00064200  |
| H  | 3.17792500  | 2.67423500  | 0.00024800  |
| H  | 2.92229200  | -2.38954200 | 0.00192000  |
| H  | -3.89539200 | -4.59272000 | 0.00191600  |
| H  | -7.27981600 | 1.97153800  | -0.00084700 |
| H  | -3.47334600 | 5.46982000  | 0.00091700  |
| C  | -0.91641300 | -5.04850900 | 0.00225100  |
| C  | -1.64545300 | -6.39496100 | 0.00201900  |
| H  | -0.24955000 | -4.98372900 | 0.87336400  |
| H  | -0.24920300 | -4.98361600 | -0.86858500 |
| H  | -0.92455000 | -7.21887100 | 0.00208500  |
| H  | -2.28120700 | -6.50417500 | 0.88798000  |
| H  | -2.28088900 | -6.50403500 | -0.88418800 |
| C  | -0.46769000 | 5.66979400  | 0.00119200  |
| C  | -1.08074600 | 7.07289900  | 0.00121000  |
| H  | 0.19135900  | 5.54888100  | -0.86984800 |
| H  | 0.19143600  | 5.54889200  | 0.87217400  |
| H  | -0.29324300 | 7.83340400  | 0.00118300  |
| H  | -1.70509300 | 7.23488900  | -0.88481100 |
| H  | -1.70503200 | 7.23488400  | 0.88727500  |
| C  | 4.27147700  | 0.80346400  | 0.00048400  |
| C  | 6.41730300  | -0.12114800 | -0.00011800 |
| C  | 7.77130400  | -0.28084500 | -0.00080900 |
| C  | 8.49732300  | -1.58994600 | -0.00064300 |
| C  | 9.98916300  | 0.19235200  | -0.00248600 |
| C  | 9.91610700  | -1.22059300 | -0.00179300 |
| C  | 11.21873300 | 0.85009300  | -0.00368700 |
| C  | 11.07846000 | -1.99557800 | -0.00226500 |
| C  | 12.37056100 | 0.05830100  | -0.00416500 |
| H  | 11.28192700 | 1.93366200  | -0.00424600 |
| C  | 12.31200800 | -1.34692600 | -0.00345900 |
| H  | 11.00964300 | -3.07954300 | -0.00171800 |
| H  | 13.34052200 | 0.54781000  | -0.00511100 |
| H  | 13.23182800 | -1.92307800 | -0.00385700 |
| N  | 5.48363200  | -1.14167800 | 0.00078300  |

|   |              |             |             |
|---|--------------|-------------|-------------|
| N | 8.70472500   | 0.72875700  | -0.00180500 |
| H | 5.75003100   | -2.11883400 | 0.00099800  |
| H | 8.44692700   | 1.70777600  | -0.00211500 |
| O | 7.95297800   | -2.69759300 | 0.00018400  |
| C | 5.69183800   | 1.17703700  | -0.00034400 |
| O | 6.22415900   | 2.29197400  | -0.00109700 |
| C | -7.64312500  | -1.04367700 | -0.00079900 |
| C | -8.98697000  | -0.78690800 | -0.00336000 |
| H | -7.35487100  | -2.09079600 | 0.00055000  |
| C | -9.52658100  | 0.53528800  | -0.00593200 |
| N | -9.94928500  | 1.62031500  | -0.00803400 |
| C | -10.00251900 | -1.86866000 | -0.00422100 |
| O | -11.20399500 | -1.67230700 | -0.00757600 |
| O | -9.45949300  | -3.10545600 | -0.00086600 |
| H | -10.20383900 | -3.73659300 | -0.00196700 |

#### L4

|    |             |             |             |
|----|-------------|-------------|-------------|
| N  | 1.80269800  | -0.02154200 | -0.00129500 |
| C  | 2.39036600  | -1.25456000 | -0.00092200 |
| N  | 1.79331800  | -2.44475200 | -0.00095600 |
| N  | -0.50050900 | -1.68268300 | -0.00140600 |
| C  | 0.46154400  | -2.63463100 | -0.00121300 |
| C  | -0.17178200 | -3.97119200 | -0.00101600 |
| N  | 0.11066700  | 2.26385000  | -0.00121000 |
| N  | -2.17812400 | 0.59778100  | -0.00138100 |
| C  | 1.31436800  | 2.87841100  | -0.00116400 |
| C  | -2.79494000 | 1.82458800  | -0.00087200 |
| C  | -1.73182200 | -2.29968500 | -0.00142700 |
| C  | 1.11842600  | 4.34365000  | -0.00107200 |
| C  | -4.21636800 | 1.62995400  | -0.00033200 |
| C  | -1.51752900 | -3.74639000 | -0.00119500 |
| N  | 2.52738500  | 2.29178800  | -0.00097700 |
| N  | -2.18961100 | 3.03378700  | -0.00079000 |
| N  | -2.92077300 | -1.70900500 | -0.00140200 |
| C  | 2.73761700  | 0.97887500  | -0.00091200 |
| C  | -0.87816100 | 3.22716400  | -0.00099500 |
| C  | -3.11903000 | -0.37436900 | -0.00127200 |
| C  | -0.23201300 | 4.53888800  | -0.00088300 |
| C  | -4.44517500 | 0.25539800  | -0.00066000 |
| Zn | -0.19644700 | 0.29177600  | -0.00150900 |
| H  | -2.31639600 | -4.47560000 | -0.00106500 |
| H  | -4.94453100 | 2.42748500  | 0.00014500  |
| H  | -0.77173700 | 5.47615900  | -0.00070100 |



|   |             |             |             |
|---|-------------|-------------|-------------|
| C | 0.59205600  | -5.26114300 | -0.00058200 |
| C | -0.28406000 | -6.51681600 | 0.00108600  |
| H | 1.26271300  | -5.27095400 | 0.86992500  |
| H | 1.26140900  | -5.27235200 | -0.87208900 |
| H | 0.33918100  | -7.41684600 | 0.00138600  |
| H | -0.92723700 | -6.55253000 | 0.88765300  |
| H | -0.92853400 | -6.55403200 | -0.88447700 |
| C | 2.23820700  | 5.34089900  | -0.00120500 |
| C | 1.78397400  | 6.80315900  | 0.00085700  |
| H | 2.87876200  | 5.14861300  | -0.87322000 |
| H | 2.88068700  | 5.14669900  | 0.86894900  |
| H | 2.65045100  | 7.47227800  | 0.00059800  |
| H | 1.18023700  | 7.03389600  | -0.88417800 |
| H | 1.18221400  | 7.03196900  | 0.88773400  |
| C | 3.85190200  | -1.06209400 | -0.00025400 |
| C | 4.89597200  | -1.95456200 | 0.00041200  |
| C | 6.22293200  | -1.43882900 | 0.00124900  |
| C | 6.43846600  | -0.01868000 | 0.00136500  |
| C | 5.33817500  | 0.88030700  | 0.00059900  |
| C | 4.06979900  | 0.35293500  | -0.00019200 |
| H | 7.26653300  | -3.34715600 | 0.00202000  |
| H | 4.72413100  | -3.02673800 | 0.00038900  |
| C | 7.37463900  | -2.26646000 | 0.00207400  |
| C | 7.78452100  | 0.44177800  | 0.00233800  |
| H | 5.50592700  | 1.95346100  | 0.00070600  |
| H | 7.96918200  | 1.51639500  | 0.00246300  |
| C | 8.62515700  | -1.68978900 | 0.00298300  |
| H | 9.51815600  | -2.31024400 | 0.00365800  |
| N | 8.84333000  | -0.34412400 | 0.00313700  |
| C | -5.64326400 | -0.52792700 | -0.00048000 |
| C | -6.94960900 | -0.12096700 | 0.00145700  |
| H | -5.47546400 | -1.60086100 | -0.00189700 |
| C | -7.33614900 | 1.25374500  | 0.00414700  |
| N | -7.63310000 | 2.37970000  | 0.00641700  |
| C | -8.08113400 | -1.08050900 | 0.00146200  |
| O | -9.25255600 | -0.74898100 | 0.00450000  |
| O | -7.68222500 | -2.37100800 | -0.00228700 |
| H | -8.49351500 | -2.91348300 | -0.00168500 |

## L5

|   |             |             |            |
|---|-------------|-------------|------------|
| N | -1.00527500 | 0.10690900  | 0.00056900 |
| C | -1.64551000 | -1.10083300 | 0.00055800 |

|    |             |             |             |
|----|-------------|-------------|-------------|
| N  | -1.09726300 | -2.31510600 | 0.00053000  |
| N  | 1.22682000  | -1.65059700 | 0.00055600  |
| C  | 0.22523700  | -2.55982700 | 0.00052400  |
| C  | 0.80106400  | -3.92310600 | 0.00039600  |
| N  | 0.78529600  | 2.31771700  | 0.00056000  |
| N  | 3.00134300  | 0.55495200  | 0.00035900  |
| C  | -0.38981900 | 2.98317700  | 0.00057400  |
| C  | 3.67096200  | 1.75495100  | 0.00016500  |
| C  | 2.43175900  | -2.32011400 | 0.00042700  |
| C  | -0.13164600 | 4.43872300  | 0.00051400  |
| C  | 5.08077700  | 1.50026500  | -0.00021500 |
| C  | 2.15478000  | -3.75660100 | 0.00035300  |
| N  | -1.62785200 | 2.44984700  | 0.00061000  |
| N  | 3.11660400  | 2.98958600  | 0.00021700  |
| N  | 3.64387400  | -1.78259600 | 0.00029500  |
| C  | -1.89490000 | 1.14812900  | 0.00059900  |
| C  | 1.81589900  | 3.23861200  | 0.00039300  |
| C  | 3.89992500  | -0.45595900 | 0.00024100  |
| C  | 1.22573900  | 4.57642500  | 0.00038700  |
| C  | 5.25066100  | 0.11564100  | -0.00021000 |
| Zn | 1.00782900  | 0.33473700  | 0.00054700  |
| H  | 2.92169000  | -4.51943700 | 0.00022900  |
| H  | 5.84243600  | 2.26587500  | -0.00042200 |
| H  | 1.80476900  | 5.49005500  | 0.00028100  |
| C  | -0.01805200 | -5.17861500 | 0.00033000  |
| C  | 0.80251400  | -6.47134500 | -0.00047300 |
| H  | -0.68839100 | -5.15968100 | -0.87030800 |
| H  | -0.68759900 | -5.16029200 | 0.87159900  |
| H  | 0.14067500  | -7.34341900 | -0.00053500 |
| H  | 1.44383900  | -6.53550500 | -0.88680200 |
| H  | 1.44453100  | -6.53617400 | 0.88530400  |
| C  | -1.20828300 | 5.48228500  | 0.00061300  |
| C  | -0.69311300 | 6.92423600  | -0.00037400 |
| H  | -1.85703100 | 5.31699600  | 0.87209000  |
| H  | -1.85804800 | 5.31610900  | -0.86992300 |
| H  | -1.53080600 | 7.62906300  | -0.00029200 |
| H  | -0.08074100 | 7.12890000  | 0.88518000  |
| H  | -0.08164500 | 7.12799600  | -0.88676000 |
| C  | -3.09455400 | -0.84787300 | 0.00051800  |
| C  | -4.17503900 | -1.68710500 | 0.00043700  |
| C  | -5.48560400 | -1.11525600 | 0.00037900  |
| C  | -5.65158700 | 0.32866000  | 0.00043800  |
| C  | -4.49002100 | 1.16863400  | 0.00053400  |
| C  | -3.25513400 | 0.58185400  | 0.00056000  |

|   |              |             |             |
|---|--------------|-------------|-------------|
| H | -6.56248100  | -2.98351200 | 0.00018700  |
| H | -4.05453500  | -2.76665500 | 0.00038900  |
| C | -6.64433500  | -1.89888400 | 0.00024700  |
| H | -4.62378800  | 2.24519100  | 0.00055600  |
| C | -9.23893600  | 0.78543800  | 0.00016400  |
| C | -9.12592200  | -2.03761600 | 0.00001300  |
| C | -10.38866200 | 0.03717900  | 0.00001100  |
| H | -9.26303700  | 1.87067800  | 0.00022000  |
| C | -10.33396200 | -1.38863600 | -0.00006700 |
| H | -9.07619600  | -3.12343300 | -0.00005000 |
| H | -11.35678900 | 0.52992900  | -0.00005500 |
| H | -11.25926800 | -1.95713600 | -0.00019200 |
| C | -7.95880300  | 0.14979400  | 0.00024700  |
| C | -7.90584800  | -1.29488500 | 0.00017000  |
| N | -6.85616100  | 0.92175700  | 0.00037600  |
| C | 6.41335300   | -0.71789600 | -0.00049600 |
| C | 7.73669000   | -0.36798300 | -0.00166100 |
| H | 6.19865000   | -1.78249800 | 0.00011800  |
| C | 8.18277500   | 0.98841200  | -0.00288300 |
| N | 8.52925600   | 2.10019100  | -0.00386600 |
| C | 8.82520300   | -1.37524800 | -0.00192000 |
| O | 10.01028000  | -1.09572900 | -0.00349600 |
| O | 8.37078400   | -2.64769100 | 0.00006700  |
| H | 9.15822800   | -3.22419900 | -0.00018200 |

## L6

|   |             |             |             |
|---|-------------|-------------|-------------|
| N | 1.80595600  | -0.01987300 | -0.00049800 |
| C | 2.39285900  | -1.25252400 | -0.00049400 |
| N | 1.79723400  | -2.44338700 | -0.00039700 |
| N | -0.49640400 | -1.68199200 | -0.00015500 |
| C | 0.46638700  | -2.63482300 | -0.00030200 |
| C | -0.16703500 | -3.97106400 | -0.00030000 |
| N | 0.11390000  | 2.26498800  | -0.00040500 |
| N | -2.17377100 | 0.59802400  | -0.00002100 |
| C | 1.31805000  | 2.88131300  | -0.00048200 |
| C | -2.79018300 | 1.82422400  | 0.00012300  |
| C | -1.72612700 | -2.29891300 | -0.00006200 |
| C | 1.12091000  | 4.34574800  | -0.00010200 |
| C | -4.21414600 | 1.62830800  | 0.00061200  |
| C | -1.51286500 | -3.74550100 | -0.00018700 |
| N | 2.53011200  | 2.29372800  | -0.00073600 |
| N | -2.18706800 | 3.03206000  | 0.00010500  |

|    |             |             |             |
|----|-------------|-------------|-------------|
| N  | -2.91649200 | -1.70758300 | 0.00016500  |
| C  | 2.73832300  | 0.98092100  | -0.00077800 |
| C  | -0.87403600 | 3.22681700  | -0.00010000 |
| C  | -3.11424000 | -0.37460600 | 0.00024100  |
| C  | -0.23013200 | 4.53913700  | 0.00003300  |
| C  | -4.44213200 | 0.25576200  | 0.00054900  |
| Zn | -0.19323200 | 0.29258800  | -0.00044700 |
| H  | -2.31205200 | -4.47424100 | -0.00010500 |
| H  | -4.94190300 | 2.42618900  | 0.00093000  |
| H  | -0.77107600 | 5.47562000  | 0.00036000  |
| C  | 0.59608600  | -5.26148700 | -0.00056500 |
| C  | -0.28082900 | -6.51660500 | 0.00032400  |
| H  | 1.26668700  | -5.27194100 | 0.86995900  |
| H  | 1.26530600  | -5.27236100 | -0.87218500 |
| H  | 0.34213200  | -7.41677700 | 0.00023600  |
| H  | -0.92405600 | -6.55247800 | 0.88682500  |
| H  | -0.92502500 | -6.55303600 | -0.88544800 |
| C  | 2.23911000  | 5.34477700  | 0.00009600  |
| C  | 1.78246000  | 6.80627400  | 0.00074800  |
| H  | 2.88062400  | 5.15284200  | -0.87126500 |
| H  | 2.88093200  | 5.15216500  | 0.87107600  |
| H  | 2.64800400  | 7.47653600  | 0.00090800  |
| H  | 1.17936900  | 7.03550600  | -0.88509000 |
| H  | 1.17960300  | 7.03477400  | 0.88692500  |
| C  | 3.85366200  | -1.05911400 | -0.00056600 |
| C  | 4.90093700  | -1.95255900 | -0.00035100 |
| C  | 6.21433000  | -1.42117700 | -0.00041300 |
| C  | 6.43220200  | -0.01277000 | -0.00085000 |
| C  | 5.34045600  | 0.89025600  | -0.00109400 |
| C  | 4.07234800  | 0.35477200  | -0.00085100 |
| H  | 7.29433900  | -3.31362000 | 0.00054500  |
| H  | 4.73464500  | -3.02548000 | -0.00007000 |
| C  | 7.38809300  | -2.22876700 | 0.00007300  |
| C  | 7.79501800  | 0.40282300  | -0.00093400 |
| H  | 5.50553000  | 1.96337800  | -0.00138200 |
| H  | 8.03301200  | 1.46546300  | -0.00146800 |
| N  | 8.61753500  | -1.76494000 | 0.00006700  |
| N  | 8.82700400  | -0.41056400 | -0.00054400 |
| C  | -5.64042700 | -0.52911800 | 0.00092500  |
| C  | -6.94583200 | -0.12210800 | 0.00111400  |
| H  | -5.47194000 | -1.60193500 | 0.00107900  |
| C  | -7.33201000 | 1.25280900  | 0.00102100  |
| N  | -7.62791200 | 2.37897500  | 0.00093100  |
| C  | -8.07818400 | -1.08189500 | 0.00152100  |

|   |             |             |            |
|---|-------------|-------------|------------|
| O | -9.24891800 | -0.74882100 | 0.00210600 |
| O | -7.67934000 | -2.37174900 | 0.00124500 |
| H | -8.49006500 | -2.91516100 | 0.00147900 |

## L7

|    |             |             |             |
|----|-------------|-------------|-------------|
| N  | 1.40334900  | 0.02432700  | -0.00058200 |
| C  | 2.00542700  | -1.20026500 | -0.00072800 |
| N  | 1.39971700  | -2.39231200 | -0.00072600 |
| N  | -0.89684600 | -1.63858300 | -0.00030500 |
| C  | 0.07289400  | -2.58799800 | -0.00044500 |
| C  | -0.55830400 | -3.92635900 | -0.00008900 |
| N  | -0.29177800 | 2.30470000  | -0.00051700 |
| N  | -2.57152100 | 0.63658100  | -0.00013600 |
| C  | 0.91654700  | 2.91875200  | -0.00027900 |
| C  | -3.18888600 | 1.86146500  | -0.00019900 |
| C  | -2.12040200 | -2.25790900 | 0.00029800  |
| C  | 0.71836100  | 4.38420000  | 0.00000500  |
| C  | -4.61623400 | 1.66318400  | 0.00006800  |
| C  | -1.90474300 | -3.70399800 | 0.00045600  |
| N  | 2.12484400  | 2.33156900  | -0.00022200 |
| N  | -2.59161100 | 3.06921800  | -0.00030300 |
| N  | -3.31505700 | -1.66789800 | 0.00068100  |
| C  | 2.34513000  | 1.01480700  | -0.00038000 |
| C  | -1.27527400 | 3.26457400  | -0.00033400 |
| C  | -3.51107000 | -0.33741400 | 0.00043300  |
| C  | -0.63271500 | 4.57740800  | -0.00005200 |
| C  | -4.84224500 | 0.29310300  | 0.00059400  |
| Zn | -0.58659200 | 0.33261900  | -0.00056800 |
| H  | -2.70205400 | -4.43479600 | 0.00087300  |
| H  | -5.34381100 | 2.46128000  | 0.00011800  |
| H  | -1.17374900 | 5.51381900  | 0.00012300  |
| C  | 0.20390500  | -5.21727100 | -0.00029400 |
| C  | -0.67381500 | -6.47207000 | 0.00009700  |
| H  | 0.87349500  | -5.22910400 | 0.87104500  |
| H  | 0.87283900  | -5.22919400 | -0.87213500 |
| H  | -0.05132000 | -7.37256000 | -0.00016500 |
| H  | -1.31707600 | -6.50779700 | 0.88654200  |
| H  | -1.31784300 | -6.50781000 | -0.88579000 |
| C  | 1.83335100  | 5.38668000  | 0.00032600  |
| C  | 1.37242100  | 6.84702700  | 0.00099400  |
| H  | 2.47503400  | 5.19763000  | -0.87157500 |

|   |             |             |             |
|---|-------------|-------------|-------------|
| H | 2.47519600  | 5.19687500  | 0.87193900  |
| H | 2.23609300  | 7.51968700  | 0.00123600  |
| H | 0.76882500  | 7.07443400  | -0.88492100 |
| H | 0.76893700  | 7.07364400  | 0.88718900  |
| C | 6.57055000  | 2.76275900  | 0.00166200  |
| C | 5.26079200  | 2.32987100  | 0.00083200  |
| C | 4.99412000  | 0.94069400  | 0.00027000  |
| C | 6.10647900  | 0.04615500  | 0.00050900  |
| C | 7.59739900  | 1.79863700  | 0.00186800  |
| C | 3.67486000  | 0.37973700  | -0.00031300 |
| C | 5.88461900  | -1.40307000 | -0.00003500 |
| C | 4.55540800  | -1.92351700 | -0.00068200 |
| C | 3.46439900  | -0.99328200 | -0.00066900 |
| C | 4.39401300  | -3.32877300 | -0.00125200 |
| H | 3.39267600  | -3.74251200 | -0.00175800 |
| C | 5.51429700  | -4.13382600 | -0.00112300 |
| C | 6.78274700  | -3.52128300 | -0.00038500 |
| H | 6.81450600  | 3.82050700  | 0.00216500  |
| H | 4.42920200  | 3.02434300  | 0.00066100  |
| H | 8.63941800  | 2.11631500  | 0.00253600  |
| H | 5.43058800  | -5.21609700 | -0.00155900 |
| H | 7.68184500  | -4.13637900 | -0.00022400 |
| N | 7.38477400  | 0.49080900  | 0.00128800  |
| N | 6.97158400  | -2.20984100 | 0.00014500  |
| C | -6.04021600 | -0.49408300 | 0.00164900  |
| C | -7.34518400 | -0.08750000 | 0.00010600  |
| H | -5.87044100 | -1.56666100 | 0.00386300  |
| C | -7.73184700 | 1.28755400  | -0.00383600 |
| N | -8.02762500 | 2.41362800  | -0.00734100 |
| C | -8.47820600 | -1.04784200 | 0.00204800  |
| O | -9.64838400 | -0.71393500 | 0.00078300  |
| O | -8.07863900 | -2.33717500 | 0.00545300  |
| H | -8.88871700 | -2.88160700 | 0.00637100  |

## L8

|   |             |             |            |
|---|-------------|-------------|------------|
| N | -1.80937900 | -0.01645200 | 0.00112900 |
| C | -2.39718900 | -1.24888800 | 0.00070900 |
| N | -1.80249100 | -2.43941200 | 0.00076300 |
| N | 0.49197300  | -1.68065900 | 0.00128000 |
| C | -0.47137200 | -2.63195000 | 0.00102400 |
| C | 0.16018400  | -3.96890000 | 0.00095800 |

|    |             |             |             |
|----|-------------|-------------|-------------|
| N  | -0.11453200 | 2.26673500  | 0.00126100  |
| N  | 2.17205400  | 0.59777900  | 0.00153200  |
| C  | -1.31768400 | 2.88346500  | 0.00101500  |
| C  | 2.78991000  | 1.82342600  | 0.00122600  |
| C  | 1.72174200  | -2.29892500 | 0.00124300  |
| C  | -1.11951700 | 4.34805400  | 0.00084100  |
| C  | 4.21245100  | 1.62668700  | 0.00091600  |
| C  | 1.50637000  | -3.74524100 | 0.00106300  |
| N  | -2.53077100 | 2.29758500  | 0.00074800  |
| N  | 2.18700700  | 3.03268600  | 0.00114600  |
| N  | 2.91207900  | -1.70909500 | 0.00123800  |
| C  | -2.74138000 | 0.98513400  | 0.00070300  |
| C  | 0.87497500  | 3.22809500  | 0.00117200  |
| C  | 3.11160000  | -0.37578100 | 0.00127900  |
| C  | 0.23146300  | 4.54087200  | 0.00093900  |
| C  | 4.43940400  | 0.25286100  | 0.00090400  |
| Zn | 0.19077100  | 0.29417300  | 0.00151400  |
| H  | 2.30453500  | -4.47523500 | 0.00100500  |
| H  | 4.94119000  | 2.42371700  | 0.00065000  |
| H  | 0.77285400  | 5.47717200  | 0.00080600  |
| C  | -0.60491300 | -5.25811700 | 0.00076800  |
| C  | 0.27011700  | -6.51465100 | 0.00012800  |
| H  | -1.27519200 | -5.26764900 | -0.87000800 |
| H  | -1.27468000 | -5.26821300 | 0.87194000  |
| H  | -0.35420200 | -7.41389300 | -0.00001400 |
| H  | 0.91361400  | -6.55146700 | -0.88619100 |
| H  | 0.91406200  | -6.55207100 | 0.88609500  |
| C  | -2.23725000 | 5.34760100  | 0.00062200  |
| C  | -1.77992400 | 6.80890200  | -0.00105900 |
| H  | -2.87848500 | 5.15659000  | 0.87241300  |
| H  | -2.87966300 | 5.15488500  | -0.86990700 |
| H  | -2.64504200 | 7.47974600  | -0.00120400 |
| H  | -1.17623300 | 7.03829000  | 0.88435400  |
| H  | -1.17725100 | 7.03654200  | -0.88761500 |
| C  | -3.85960400 | -1.05505100 | 0.00007100  |
| C  | -4.90246300 | -1.95047200 | -0.00059900 |
| C  | -6.22454900 | -1.42918300 | -0.00134400 |
| C  | -6.43665300 | -0.01095200 | -0.00135300 |
| C  | -5.34236300 | 0.89210000  | -0.00064200 |
| C  | -4.07509900 | 0.36065000  | 0.00005500  |
| H  | -4.75007600 | -3.02431100 | -0.00062800 |
| C  | -7.79246300 | 0.40914500  | -0.00219000 |
| H  | -5.51073500 | 1.96512700  | -0.00068400 |
| H  | -8.02541700 | 1.47430400  | -0.00224100 |

|   |             |             |             |
|---|-------------|-------------|-------------|
| C | -8.48515600 | -1.75674000 | -0.00283400 |
| N | -7.28346500 | -2.29207700 | -0.00209200 |
| N | -8.80755300 | -0.43179700 | -0.00293200 |
| H | -9.32977700 | -2.44284900 | -0.00345000 |
| C | 5.63688800  | -0.53264100 | 0.00044900  |
| C | 6.94319400  | -0.12694900 | -0.00135200 |
| H | 5.46774600  | -1.60538200 | 0.00159600  |
| C | 7.33100700  | 1.24759300  | -0.00318600 |
| N | 7.62836500  | 2.37336300  | -0.00438200 |
| C | 8.07422400  | -1.08789300 | -0.00212800 |
| O | 9.24558400  | -0.75663800 | -0.00555000 |
| O | 7.67399000  | -2.37750100 | 0.00104400  |
| H | 8.48432800  | -2.92148300 | -0.00050400 |

## L9

|    |             |             |             |
|----|-------------|-------------|-------------|
| N  | -1.57361400 | 0.12257500  | 0.00237300  |
| C  | -2.21789400 | -1.08223800 | 0.00185900  |
| N  | -1.67700900 | -2.29924000 | 0.00191400  |
| N  | 0.64882300  | -1.64124000 | 0.00225600  |
| C  | -0.35608800 | -2.55024300 | 0.00213500  |
| C  | 0.21725900  | -3.91296700 | 0.00202400  |
| N  | 0.21336400  | 2.32949700  | 0.00209900  |
| N  | 2.42411300  | 0.56301500  | 0.00201800  |
| C  | -0.96339400 | 2.99712400  | 0.00189700  |
| C  | 3.09396000  | 1.76056700  | 0.00121600  |
| C  | 1.84915500  | -2.31188800 | 0.00198700  |
| C  | -0.70188800 | 4.45193700  | 0.00135100  |
| C  | 4.50793200  | 1.50210700  | 0.00022600  |
| C  | 1.57203300  | -3.74745700 | 0.00188700  |
| N  | -2.19979700 | 2.46390800  | 0.00181200  |
| N  | 2.54542400  | 2.99457400  | 0.00112100  |
| N  | 3.06488600  | -1.77322300 | 0.00165500  |
| C  | -2.46536800 | 1.16018100  | 0.00186500  |
| C  | 1.24202200  | 3.24683900  | 0.00151800  |
| C  | 3.32071300  | -0.45069000 | 0.00151300  |
| C  | 0.65614600  | 4.58639200  | 0.00110900  |
| C  | 4.67517100  | 0.12075900  | 0.00042600  |
| Zn | 0.43205300  | 0.34499600  | 0.00251300  |
| H  | 2.33800000  | -4.51115200 | 0.00167700  |
| H  | 5.27020400  | 2.26714500  | -0.00051600 |
| H  | 1.23742800  | 5.49849700  | 0.00059200  |



|   |             |             |             |
|---|-------------|-------------|-------------|
| C | -0.60220800 | -5.16836900 | 0.00202100  |
| C | 0.21800500  | -6.46132600 | 0.00083200  |
| H | -1.27270900 | -5.14903900 | -0.86843600 |
| H | -1.27143500 | -5.14987100 | 0.87348800  |
| H | -0.44450400 | -7.33281800 | 0.00092500  |
| H | 0.85883900  | -6.52579700 | -0.88582600 |
| H | 0.86014500  | -6.52662600 | 0.88648300  |
| C | -1.77502100 | 5.49909900  | 0.00104100  |
| C | -1.25520900 | 6.93929400  | -0.00151300 |
| H | -2.42364200 | 5.33659600  | 0.87316300  |
| H | -2.42549700 | 5.33412300  | -0.86921300 |
| H | -2.09068200 | 7.64671300  | -0.00163900 |
| H | -0.64185100 | 7.14285900  | 0.88355600  |
| H | -0.64368800 | 7.14031600  | -0.88843100 |
| C | -3.66722900 | -0.82055600 | 0.00094500  |
| C | -4.76150300 | -1.67269500 | -0.00022600 |
| C | -6.02747600 | -1.07933500 | -0.00140200 |
| C | -6.20661100 | 0.32679000  | -0.00126900 |
| C | -5.07822500 | 1.16935000  | -0.00002200 |
| C | -3.82126500 | 0.58939600  | 0.00100600  |
| H | -4.66047900 | -2.75217600 | -0.00041600 |
| C | -7.56062900 | 0.82144600  | -0.00265800 |
| H | -5.20262600 | 2.24791100  | -0.00002300 |
| H | -7.72082400 | 1.89623400  | -0.00247200 |
| C | -8.42092300 | -1.47427400 | -0.00455300 |
| O | -7.10134800 | -1.92210900 | -0.00286800 |
| O | -9.29363900 | -2.31565200 | -0.00614600 |
| C | -8.61158100 | -0.03077400 | -0.00426600 |
| H | -9.63943700 | 0.31213600  | -0.00544100 |
| C | 5.83749900  | -0.71645600 | -0.00028800 |
| C | 7.15995600  | -0.36784300 | -0.00266900 |
| H | 5.62091800  | -1.78067900 | 0.00101000  |
| C | 7.60684700  | 0.98876000  | -0.00519100 |
| N | 7.95254100  | 2.10062700  | -0.00730900 |
| C | 8.24858400  | -1.37695000 | -0.00331100 |
| O | 9.43300900  | -1.09647900 | -0.00624300 |
| O | 7.79252400  | -2.64785200 | -0.00039100 |
| H | 8.57820200  | -3.22685400 | -0.00120200 |

*2. Frontier molecular orbitals of zinc porphyrazine derivatives  
calculated at the B3LYP/6-31G(d) level in chloroform solution.*

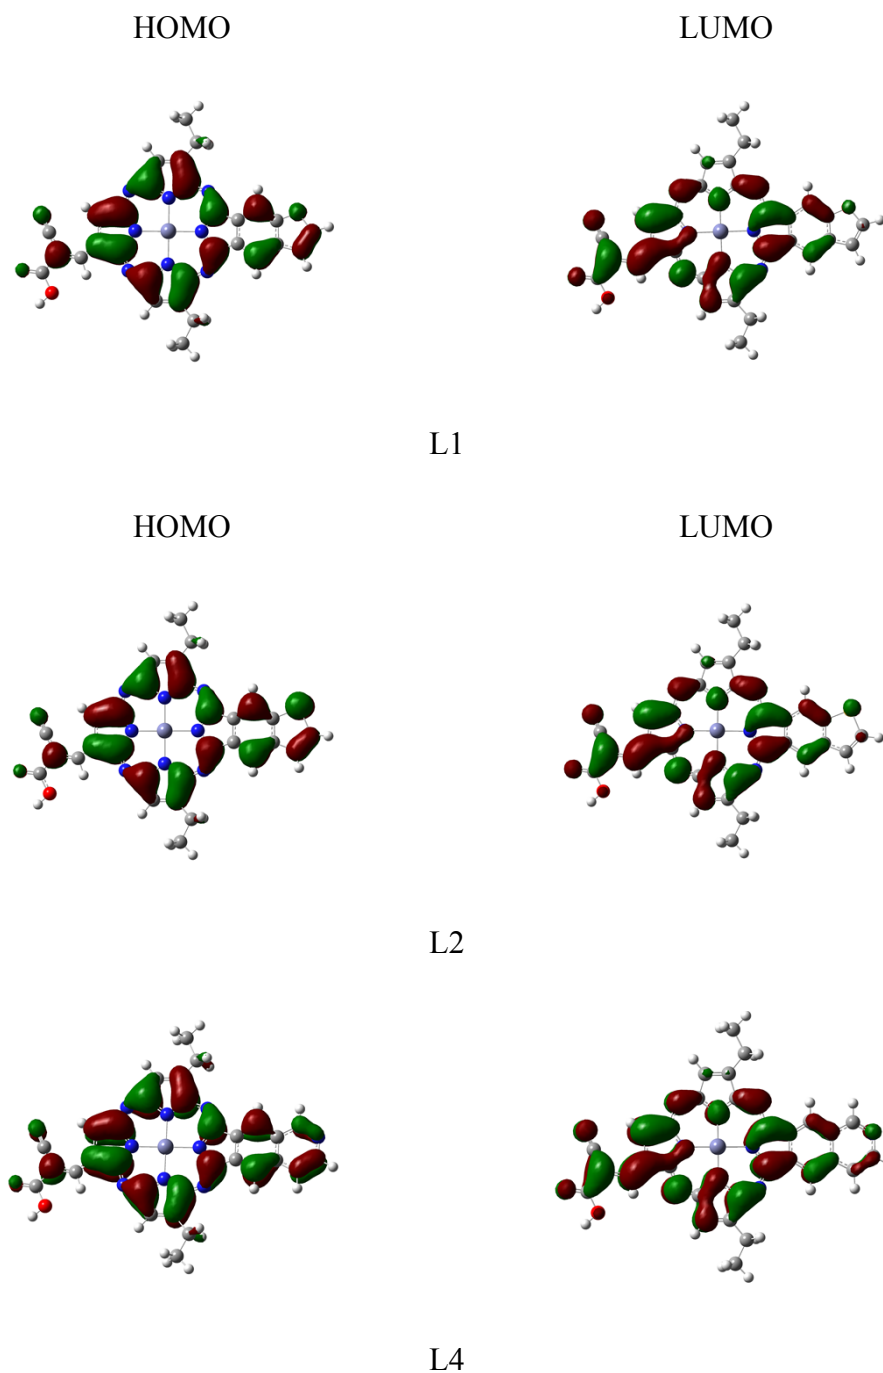

Fig. S1(a). The HOMO and LUMO of L1, L2, and L4.

HOMO

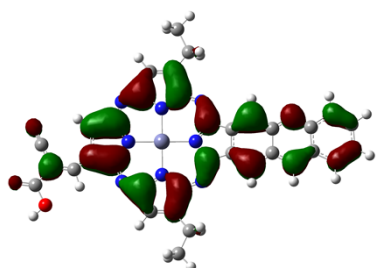

LUMO

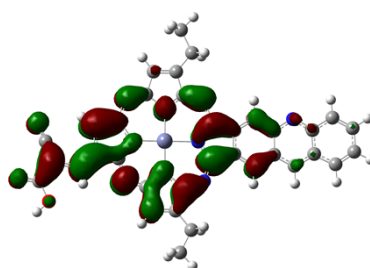

L5

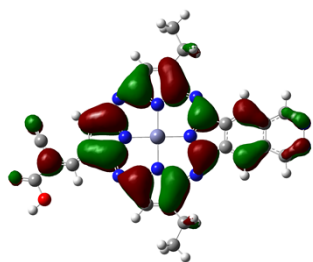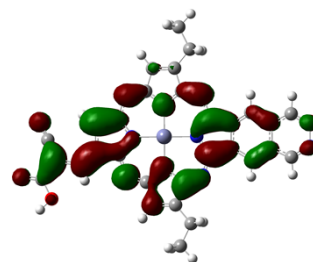

L6

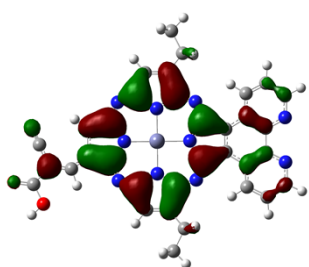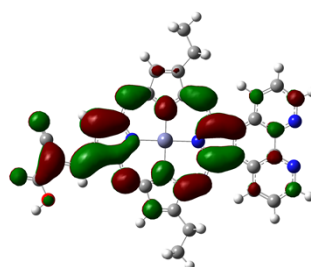

L7

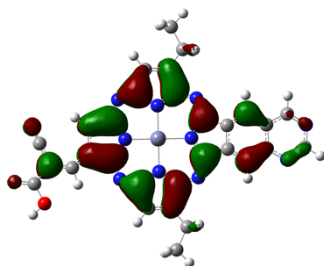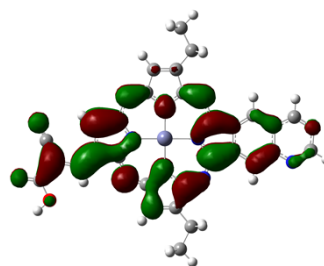

Fig. S1(b). The HOMO and LUMO of L5, L6, L7, and L8.

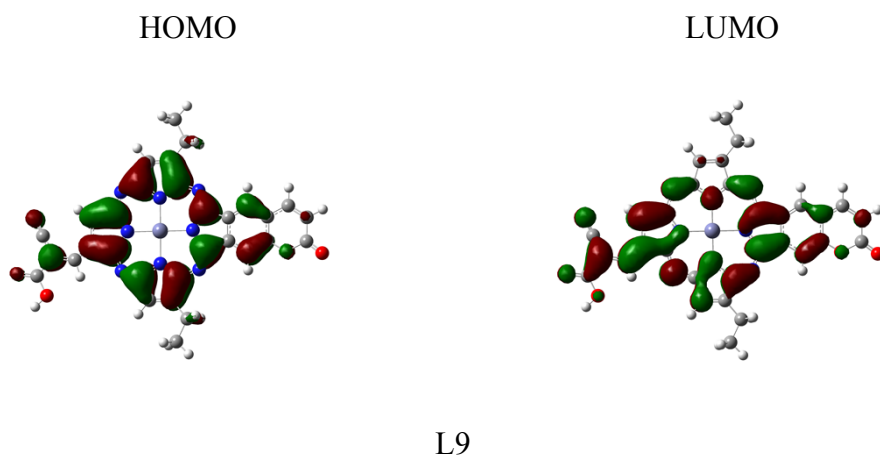

Fig. S1(c). The HOMO and LUMO of L9.

### 3. The computational details of $E_{OX}^{dye}$

The  $E_{OX}^{dye}$  is obtained by the computational method which is proposed by De Angelis et al.<sup>1</sup> The rigorous way to obtain the ground state oxidation potential  $E_{OX}^{dye}$  is to compute the free energy difference between the neutral and the oxidized ground state species,  $E_{OX}^{dye} = (G^0 - G^+)_{GS}$ . Herein  $G^0$  and  $G^+$  are free energies of the ground state in neutral and oxidized forms, respectively. The Gibbs free energy in solution of a species  $i$  ( $G_{sol}^i$ ) is defined as  $G_{sol}^i = G_{vac}^i + \Delta G_{sol}^i$ , where  $G_{vac}^i$  is the Gibbs free energy in gas phase and  $\Delta G_{sol}^i$  is the free energy of solvation.  $G_{vac}^i$  is obtained by performing a single-point calculation at the optimized geometry in vacuo, followed by frequency calculations in order to include the vibrational contribution to the total partition function.  $\Delta G_{sol}^i$  is obtained by a single-point calculation in solution and a

reference calculation in gas phase at the geometry optimized in solution.

Geometry optimization of the neutral and oxidized sensitizers were carried out in gas phase and in chloroform, that is the solvent experimentally employed for the electrochemical measures, by using the B3LYP exchange-correlation functional and a 6-31G(d) basis set for C, H, O, N, S and LANL2DZ basis set for zinc atom. Solvation effects were taken into account by means of the C-PCM salvation model as implemented in Gaussian 09 (G09).

1. M. Pastore, S. Fantacci and F. De Angelis, *J. Phys. Chem. C*, 2010, **114**, 22742.
